# Supplementary material
Source: publisher site journal article supplement (https://www.spandidos-publications.com/4469/downloadSupplementary)
Supplement: Supplementary file 1 [file downloadSupplementary]

## Sheet: Table S4
Table SIV. Survival distinctions represented by single parameter, TRA CDR3 physicochemical assessments for TCGA-BRCA and TCGA-STAD
A) BRCA
physicochemical attribute as assessed in example Table S2.	site	receptor	survival type	logrank_fvalue	logrank_pvalue	npatients	top_survival median	bot_survival median	survival_difference	physicochemical value difference_ttest_p	top_value_avg	bot_value_avg
fraction_disorder_promoting	primary tumor	TRA	OS	3.43092	0.0639864	659	112.29	244.91	-132.62	2.36428e-122	0.58269	0.469826
isoelectric_point	primary tumor	TRA	OS	2.48059	0.115259	659	inf	122.73	inf	1.35221e-136	8.01478	5.93591
fraction_charged	primary tumor	TRA	OS	0.804929	0.369624	659	129.6	112.29	17.31	1.16017e-99	0.179659	0.0917544
fraction_positive	primary tumor	TRA	OS	0.670593	0.412845	659	244.91	112.29	132.62	1.24669e-109	0.11711	0.0545976
ppii_propensity	primary tumor	TRA	OS	0.586481	0.443783	659	114.06	127.23	-13.17	4.48939e-106	0.32218	0.288244
fraction_tiny	primary tumor	TRA	OS	0.487836	0.484894	659	113.7	244.91	-131.21	2.47106e-121	0.48874	0.355409
ncpr	primary tumor	TRA	OS	0.40294	0.525575	659	inf	114.06	inf	2.93472e-114	0.0771352	-0.00513007
uversky_hydropathy	primary tumor	TRA	OS	0.358791	0.549178	659	122.73	244.91	-122.18	7.50312e-103	0.555654	0.497507
kappa	primary tumor	TRA	OS	0.358791	0.549178	659	122.73	244.91	-122.18	7.50312e-103	5.00088	4.47757
mean_hydropathy	primary tumor	TRA	OS	0.358791	0.549178	659	122.73	244.91	-122.18	7.50312e-103	5.00088	4.47757
secondary_structure_helix	primary tumor	TRA	OS	0.334783	0.562856	659	114.06	129.6	-15.54	6.35502e-127	0.35312	0.262779
fraction_expanding	primary tumor	TRA	OS	0.329585	0.565903	659	129.6	112.29	17.31	1.12044e-102	0.200354	0.108456
delta	primary tumor	TRA	OS	0.249361	0.617525	659	114.06	129.6	-15.54	1.60455e-94	0.0183541	0.00736914
molecular_weight	primary tumor	TRA	OS	0.156623	0.692285	659	112.29	127.23	-14.94	4.36542e-97	1665.85	1405.41
secondary_structure_sheet	primary tumor	TRA	OS	0.0662084	0.79694	659	216.59	114.06	102.53	9.41929e-111	0.259485	0.162512
secondary_structure_turn	primary tumor	TRA	OS	0.0524345	0.81888	659	129.6	127.23	2.37	4.73537e-116	0.316482	0.220543
fraction_negative	primary tumor	TRA	OS	0.0139903	0.905845	659	127.23	112.29	14.94	7.13168e-101	0.0791317	0.0205779
aromaticity	primary tumor	TRA	OS	0.0048957	0.944218	659	127.23	113.7	13.53	3.33213e-103	0.167307	0.100464
length	primary tumor	TRA	OS	0.00203222	0.964043	659	216.59	122.73	93.86	9.70863e-103	15.2795	12.983
fraction_aromatic	primary tumor	TRA	OS	5.61384e-05	0.994022	659	244.91	113.7	131.21	8.87428e-103	0.173503	0.104421
fraction_small	primary tumor	TRA	OS	2.60635e-06	0.998712	659	113.7	244.91	-131.21	1.42957e-116	0.64217	0.538614
B) STAD
physicochemical attribute as assessed in example Table S2.	site	receptor	survival type	logrank_fvalue	logrank_pvalue	npatients	top_survival median	bot_survival median	survival_difference	physicochemical value difference_ttest_p	top_value_avg	bot_value_avg
fraction_positive	TISSUE	TRA	OS	6.03756	0.0140046	153	21.98	68.99	-47.01	4.33342e-25	0.120918	0.0543497
fraction_expanding	TISSUE	TRA	OS	4.75799	0.0291626	153	25.69	68.99	-43.3	2.89118e-28	0.201552	0.0943499
fraction_charged	TISSUE	TRA	OS	3.90233	0.0482191	153	21.98	68.99	-47.01	1.17469e-27	0.184127	0.079572
